# Supplementary material for: Effects of Organic Elicitors on the Recycled Production of Ginkgolide B in Immobilized Cell Cultures of Ginkgo biloba
Source: MDPI journal article supplement (doi:10.3390/jfb14020095), 2023-02-09
Supplement: s1 [file s1]

Supplementary Materials

S1

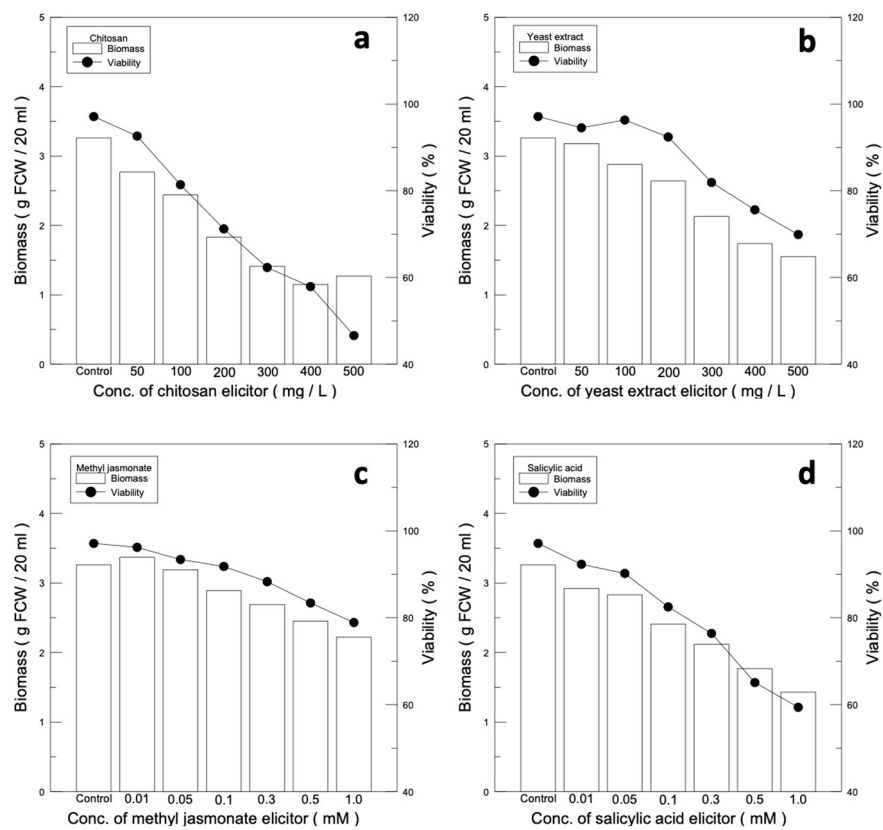

**Figure S1.** Comparison of cell growth and cell viability of ginkgo suspension cells with different concentrations of 4 individual elicitors. (a) Chitosan; (b) Yeast extract; (c) Methyl jasmonate; (d) Salicylic acid.

S2

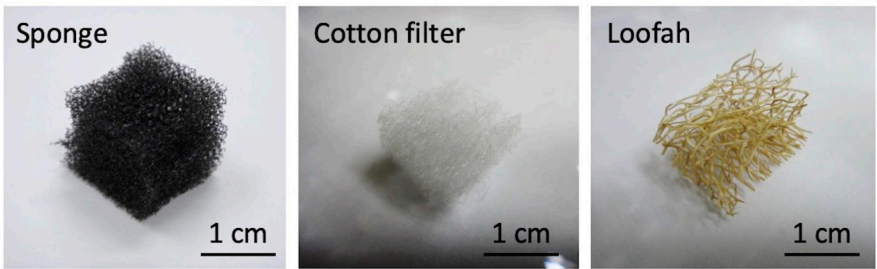

**Figure S2.** the images of immobilized materials.

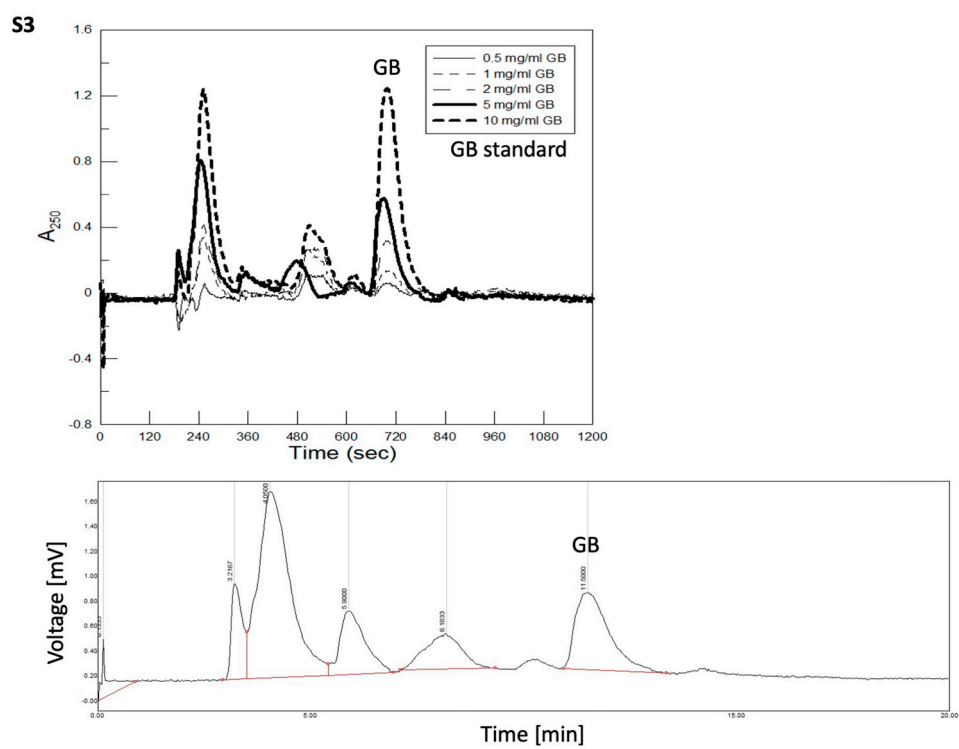

**Figure S3.** HPLC chromatograms of the GB standard and the extract.
